# Supplementary material for: Chemical synthesis of membrane proteins: a model study on the influenza virus B proton channel
Source: PubMed Central journal article supplement (PMC5897842; doi:10.1039/c8sc00004b), 2018-01-22
Supplement: SC-009-C8SC00004B-s001.pdf [file SC-009-C8SC00004B-s001.pdf]

## **Electronic Supplementary Information for**

### **Chemical synthesis of membrane proteins: a model study on the influenza virus B proton channel**

Andreas C. Baumruck, Daniel Tietze, Lena Steinacker and Alesia A. Tietze\*

\*To whom correspondence should be addressed,  
Email: [a.tietze@tietze-lab.de](mailto:a.tietze@tietze-lab.de)

# Table of Contents

|              |      |
|--------------|------|
| Tables.....  | 3-6  |
| Figures..... | 7-18 |

**Table S1. Cleavable solubility tags used to increase the solubility and NCL described in the literature**

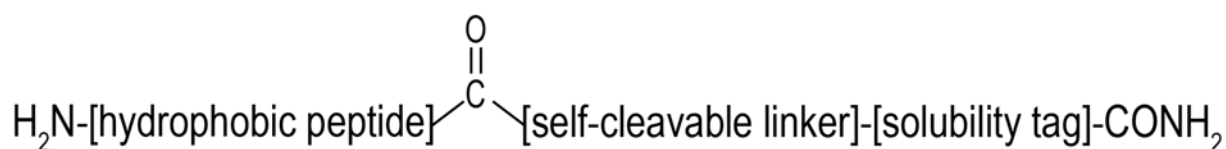

| Peptide length | Peptide name                                     | For purification | For ligation   | Strategy            | Linker                                | Solubility tag                                                  | Ref. |
|----------------|--------------------------------------------------|------------------|----------------|---------------------|---------------------------------------|-----------------------------------------------------------------|------|
| <b>12, 14</b>  | dodecaalanine (Ala12) and chemotactic protein 10 | x                |                | Boc-SPPS            | glycoamid ester <sup>a</sup>          | (GlyArg <sub>4</sub> ) <sub>4</sub>                             | 1    |
| <b>12-48</b>   | model peptides                                   | x                |                | Fmoc-SPPS           | 4-Hmb <sup>a</sup>                    | Gly(ArgGlyGly) <sub>3</sub><br>Gly(LysGly) <sub>6</sub>         | 2    |
| <b>99</b>      | HIV-1 protease                                   |                  | x              | Boc-SPPS            | 3-mercaptopropionic acid <sup>b</sup> | (Arg) <sub>6</sub>                                              | 3    |
| <b>124</b>     | ribonuclease A                                   |                  | x              | Boc-SPPS            | 3-mercaptopropionic acid <sup>b</sup> | (Arg) <sub>6</sub>                                              | 4    |
| <b>53</b>      | insulin glargine                                 | x                |                | Fmoc-SPPS           | HMBA <sup>a</sup>                     | (Lys) <sub>5</sub>                                              | 5    |
| <b>40</b>      | cancer protein NY-ESO-1                          |                  | x              | Fmoc-SPPS, Boc-SPPS | HMBA <sup>a</sup>                     | (Arg) <sub>6</sub>                                              | 6    |
| <b>121</b>     | diacylglycerol kinase (DAGK1-121)                |                  | x              | Boc-SPPS            | thioglycolic acid <sup>b</sup>        | PPO/(Arg) <sub>6</sub>                                          | 7    |
| <b>79</b>      | dengue 2 capsid protein C (DEN2C)                |                  | x              | Boc-SPPS            | 3-mercaptopropionic acid <sup>b</sup> | (Arg) <sub>6</sub>                                              | 8    |
| <b>32</b>      | conotoxins                                       | x                |                | Fmoc-SPPS           | PAM <sup>c</sup>                      | (Lys) <sub>4</sub>                                              | 9    |
| <b>42, 46</b>  | Aβ42 and Aβ46                                    | x                |                | Fmoc-SPPS           | no linker                             | (Lys) <sub>2</sub> ,<br>(Lys) <sub>3</sub> , (Lys) <sub>6</sub> | 10   |
| <b>11</b>      | Q11                                              |                  | x <sup>e</sup> | Fmoc-SPPS           | Mmsb-OH <sup>d</sup>                  | (Lys) <sub>6</sub>                                              | 11   |

HMBA – 4-hydroxymethylbenzoic acid

PPO – poly(ethyleneglycol)–polyamide

PAM – phenylacetamido

a – pH-sensitive

b – self-cleavable during NCL

c – cleavable by HF

d – reductive acidolysis using NH<sub>4</sub>l

e – fragment condensation of two fragments

**Table S2. Analytical data for peptides used in this study**

|           | Peptide                                                     | Calculated<br>M <sub>w</sub><br>[g/mol] | Experimental<br>M <sub>w</sub> <sup>[b]</sup><br>[g/mol] | t <sub>R</sub> <sup>[c]</sup><br>[min] |
|-----------|-------------------------------------------------------------|-----------------------------------------|----------------------------------------------------------|----------------------------------------|
| <b>1</b>  | ALHFL-Hmp <sup>[a]</sup>                                    | 703.36                                  | 703.40                                                   | 16.97/17.66 <sup>[d]</sup>             |
| <b>2</b>  | ALHFL-Hmp-ADO <sup>[a]</sup>                                | 848.43                                  | 848.51                                                   | 17.15/17.65 <sup>[d]</sup>             |
| <b>3</b>  | ALHFL-Hmp-ADO <sub>2</sub> <sup>[a]</sup>                   | 993.50                                  | 993.61                                                   | 17.55/17.90 <sup>[d]</sup>             |
| <b>4</b>  | ALHFL-Hmp-ADO-Lys <sub>5</sub> <sup>[a]</sup>               | 1489.91                                 | 1489.02                                                  | 6.62/6.97 <sup>[d]</sup>               |
| <b>5</b>  | [Cys <sup>22</sup> ]BM2(22-35)                              | 1637.90                                 | 1637.91                                                  | 7.98 <sup>[e]</sup>                    |
| <b>7</b>  | BM2(1-21)-NH <sub>2</sub>                                   | 2421.30                                 | 2422.35                                                  | 12.55 <sup>[f]</sup>                   |
| <b>8</b>  | [Cys <sup>11</sup> (Acm)]BM2(1-21)-Hmp                      | 2596.33                                 | 2597.32/2597.38                                          | 12.34/12.46 <sup>[g]</sup>             |
| <b>9</b>  | [Cys <sup>11</sup> (Acm)]BM2(1-21)-Hmp-ADO <sub>2</sub>     | 2886.48                                 | 2887.56/2887.56                                          | 9.95/10.36 <sup>[h]</sup>              |
| <b>10</b> | [Cys <sup>11</sup> (Acm)]BM2(1-21)-Hmp-ADO-Lys <sub>5</sub> | 3382.89                                 | 3384.27                                                  | 10.36 <sup>[g]</sup>                   |
| <b>11</b> | [Cys <sup>22</sup> ]BM2(22-51)                              | 3530.97                                 | 3531.34                                                  | 8.19 <sup>[i]</sup>                    |

[a] Corresponds to abbreviation BM2(17-21);

[b] mass peaks detected as [M+H]<sup>+</sup>;

[c] retention times of peptides **1-5** and **8, 9** are given for both diastereomers, if applicable;

[d] HPLC conditions: 15–45 % eluent B in 30 min;

[e] HPLC conditions: 20–80 % eluent B in 20 min;

[f] HPLC conditions: 50 – 99 % eluent B in 15 min, detection was at 220 nm at a flow rate of 1 mL/min, C18 column;

[g] 10 – 20% eluent B in 5 min followed by 20 – 70% eluent B in 20 min, at a flow rate of 2 mL/min, C4 column;

[h] 40 – 80 % eluent B in 20 min, at a flow rate of 1 mL/min, C18 column;

[i] 20-40 % eluent B in 30 min at a flow of 1 mL/min, C18 column.

**Table S3. Ligation results for model peptides**

|            | Ligated fragments                                                  | [ <sup>22</sup> Cys(Acm)]BM2(17-35)<br>( <b>6</b> ), [%] <sup>[a]</sup> | Hydrolyzed ester<br>(ALHFL-C <sup>α</sup> OOH)<br>[%] <sup>[a]</sup> |
|------------|--------------------------------------------------------------------|-------------------------------------------------------------------------|----------------------------------------------------------------------|
| <b>1+5</b> | ALHFL-Hmp +<br>[Cys <sup>22</sup> ]BM2(22-35)                      | 87                                                                      | 13                                                                   |
| <b>2+5</b> | ALHFL-Hmp-ADO +<br>[Cys <sup>22</sup> ]BM2(22-35)                  | 86                                                                      | 14                                                                   |
| <b>3+5</b> | ALHFL-Hmp-ADO <sub>2</sub> +<br>[Cys <sup>22</sup> ]BM2(22-35)     | 85.4                                                                    | 14.6                                                                 |
| <b>4+5</b> | ALHFL-Hmp-ADO-Lys <sub>5</sub> +<br>[Cys <sup>22</sup> ]BM2(22-35) | 84                                                                      | 16                                                                   |

[a] determined through integration of RP-HPLC chromatogram

**Table S4. Ligation results for BM2 peptides in ligation buffers A, B and C**

| Ligated fragments                                                                                                    | [Cys <sup>11</sup> (Acm)]BM2(1-51)( <b>12a</b> )/ hydrolyzed ester | [Cys <sup>11</sup> (Acm)]BM2(1-51) ( <b>12a</b> )/ hydrolyzed ester | [Cys <sup>11</sup> (Acm)]BM2(1-51) <b>12a</b> / hydrolyzed ester |
|----------------------------------------------------------------------------------------------------------------------|--------------------------------------------------------------------|---------------------------------------------------------------------|------------------------------------------------------------------|
|                                                                                                                      | in ligation buffer A <sup>[a]</sup>                                | in ligation buffer B <sup>[a]</sup>                                 | in ligation buffer C [%] <sup>[a]</sup>                          |
| <b>8a+11</b> [Cys <sup>11</sup> (Acm)]BM2(1-21)-Hmp diastereomer A+ [Cys <sup>22</sup> ]BM2(22-51)                   | n.d.                                                               | n.d.                                                                | 96/4                                                             |
| <b>8b+11</b> [Cys <sup>11</sup> (Acm)]BM2(1-21)-Hmp diastereomer B+ [Cys <sup>22</sup> ]BM2(22-51)                   | n.d.                                                               | n.d.                                                                | 97/3                                                             |
| <b>9a+11</b> [Cys <sup>11</sup> (Acm)]BM2(1-21)-Hmp-ADO <sub>2</sub> diastereomer A + [Cys <sup>22</sup> ]BM2(22-51) | n.d.                                                               | 65/45                                                               | 96/4                                                             |
| <b>9b+11</b> [Cys <sup>11</sup> (Acm)]BM2(1-21)-Hmp-ADO <sub>2</sub> diastereomer B + [Cys <sup>22</sup> ]BM2(22-51) | n.d.                                                               | n.d.                                                                | 96/4                                                             |
| <b>10+11</b> [Cys <sup>11</sup> (Acm)]BM2(1-21)-Hmp-ADO-Lys <sub>5</sub> + [Cys <sup>22</sup> ]BM2(22-51)            | 80/20                                                              | n.d.                                                                | 88/12                                                            |

[a] determined through integration of RP HPLC chromatogram

**Table S5. Characterization of BM2(1-51) products 12a, 12b and 12c**

| Peptide                                                           | Molecular formula                                                                | Calculated M <sub>w</sub> [g/mol] | Experimental M <sub>w</sub> <sup>[a]</sup> [g/mol] | t <sub>R</sub> <sup>[b]</sup> [min] |
|-------------------------------------------------------------------|----------------------------------------------------------------------------------|-----------------------------------|----------------------------------------------------|-------------------------------------|
| <b>12a</b> [Cys <sup>11</sup> (Acm), Cys <sup>22</sup> ]BM2(1-51) | C <sub>273</sub> H <sub>448</sub> N <sub>77</sub> O <sub>67</sub> S <sub>4</sub> | 1202,85                           | 1202,45                                            | 16.33                               |
| <b>12b</b> [Cys <sup>11</sup> (Acm)]BM2(1-51)                     | C <sub>273</sub> H <sub>447</sub> N <sub>77</sub> O <sub>67</sub> S <sub>3</sub> | 1196,24                           | 1196,08                                            | 14.96                               |
| <b>12c</b> BM2(1-51)                                              | C <sub>270</sub> H <sub>442</sub> N <sub>76</sub> O <sub>66</sub> S <sub>3</sub> | 1182,02                           | 1181,86                                            | 19.47                               |

[a] mass peaks detected as [M+5H]<sup>5+</sup>;

[b] HPLC conditions:45 – 70 % eluent B in 30 min, detection was at 220 nm at a flow rate of 1 mL/min, C4 column

**Table S6.** Ligation buffers used for study

|                   |                                                                                   |
|-------------------|-----------------------------------------------------------------------------------|
| Ligation buffer A | 8 M Urea, 0.2 M disodium phosphate, 150 mM MPAA, 100 mM TCEP, pH 7.0              |
| Ligation buffer B | Ligation buffer A : TFE (2:1), pH 7.5                                             |
| Ligation Buffer C | 3 M Urea, 75 mM disodium phosphate , 120 mM MPAA, 75 mM TCEP : HFIP (2:1), pH 7.5 |

MPAA = 4-mercaptophenylacetic acid, TCEP = tris(2-carboxyethyl)phosphine, TFE = 2,2,2-trifluoroethanol, HFIP = hexafluoro-2-propanol

**Table S7. Deconvolution of CD spectra: (a)** in TFE at wavelength 190-260 nm and **(b)** in liposome membrane POPC at wavelength 190-260 nm. Spectra deconvolution was performed using CDNN (Circular Dichroism analysis using Neural Networks) software.**a)**

| Sec. element     | TFE                 |                       |                       |                  |                 |
|------------------|---------------------|-----------------------|-----------------------|------------------|-----------------|
|                  | BM2(1-21)<br>(7), % | BM2(1-51)<br>(12a), % | BM2(1-51)<br>(12c), % | AM2(22-46),<br>% | BM2(1-33),<br>% |
| <b>Helix</b>     | <b>76.6</b>         | <b>66.3</b>           | <b>63.30</b>          | <b>92.3</b>      | <b>55</b>       |
| Antiparallel     | 0.2                 | 0.6                   | 0.50                  | 0                | 1.4             |
| Parallel         | 2.7                 | 3.5                   | 4.80                  | 0.9              | 5.1             |
| Beta-Turn        | 10.2                | 12.0                  | 11.60                 | 7.7              | 13.4            |
| Rndm. Coil       | 10.1                | 13.0                  | 21.10                 | 2.0              | 20              |
| <b>Total Sum</b> | <b>99.8</b>         | <b>95.5</b>           | <b>101.30</b>         | <b>102.9</b>     | <b>94.9</b>     |

**b)**

| Sec. element     | Liposome membrane (POPC) |                       |                 |
|------------------|--------------------------|-----------------------|-----------------|
|                  | BM2(1-21)<br>(7), %      | BM2(1-51)<br>(12c), % | BM2(1-33),<br>% |
| <b>Helix</b>     | <b>53.20</b>             | <b>59.20</b>          | <b>61.20</b>    |
| Antiparallel     | 0.30                     | 0.30                  | 0.40            |
| Parallel         | 9.40                     | 6.80                  | 5.70            |
| Beta-Turn        | 11.10                    | 11.00                 | 11.40           |
| Rndm. Coil       | 50.10                    | 35.40                 | 27.80           |
| <b>Total Sum</b> | <b>124.20</b>            | <b>112.70</b>         | <b>106.50</b>   |

a)

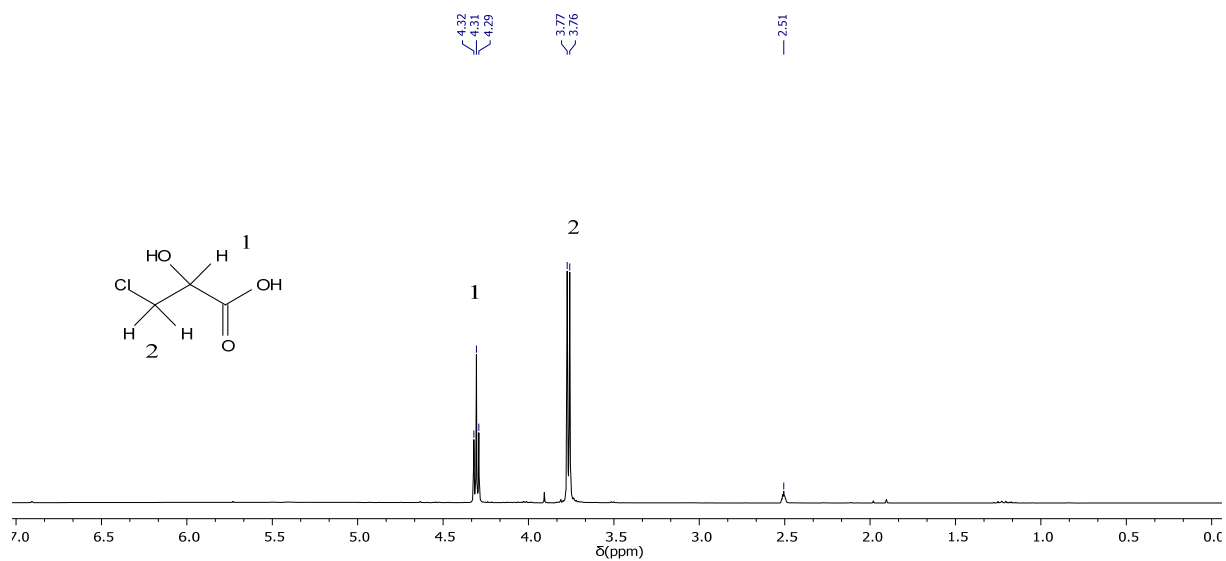

b)

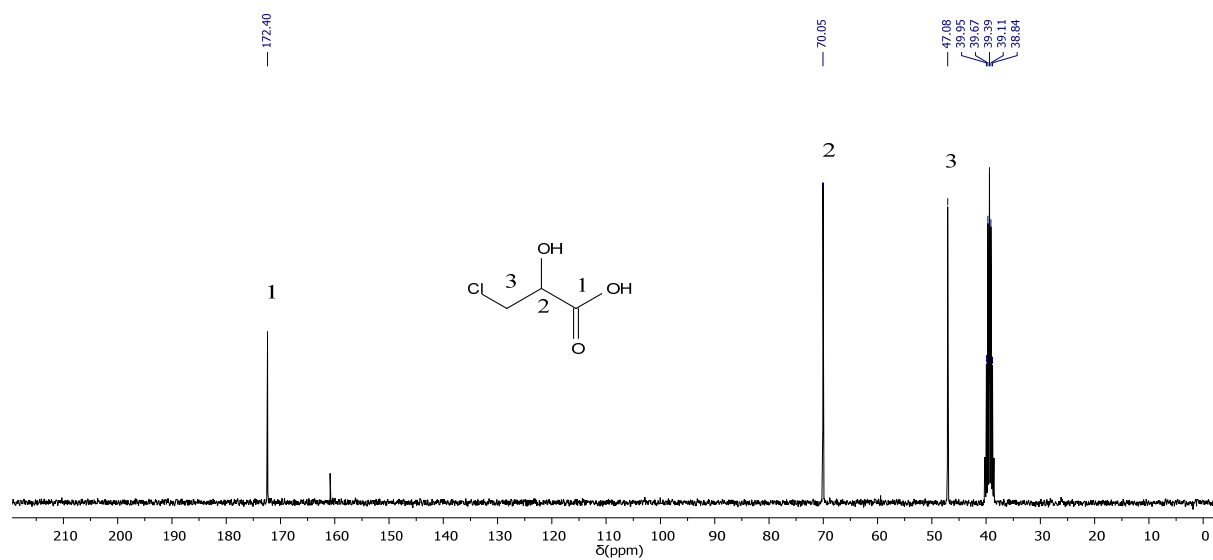

**Figure S1. Characterization of 3-chloro-2-hydroxypropanoic acid (Hmp).** (a)  $^1\text{H-NMR}$  spectrum of Hmp in DMSO- $\text{d}_6$ , (b)  $^{13}\text{C-NMR}$  spectrum of Hmp in DMSO- $\text{d}_6$

a)

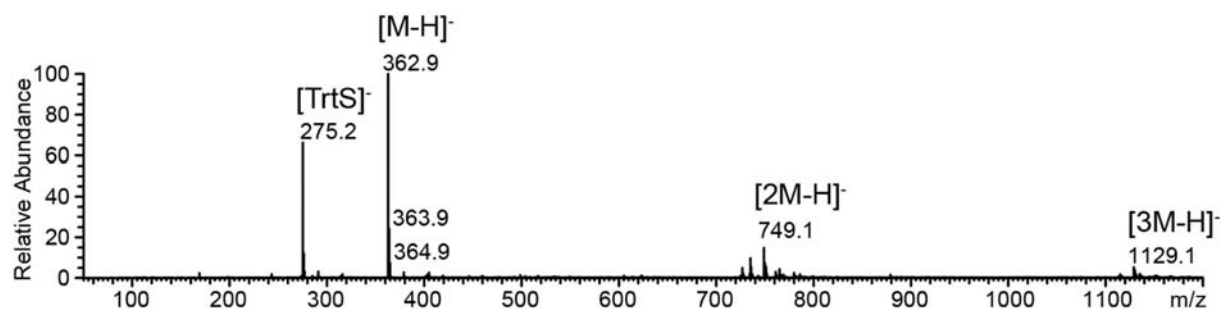

b)

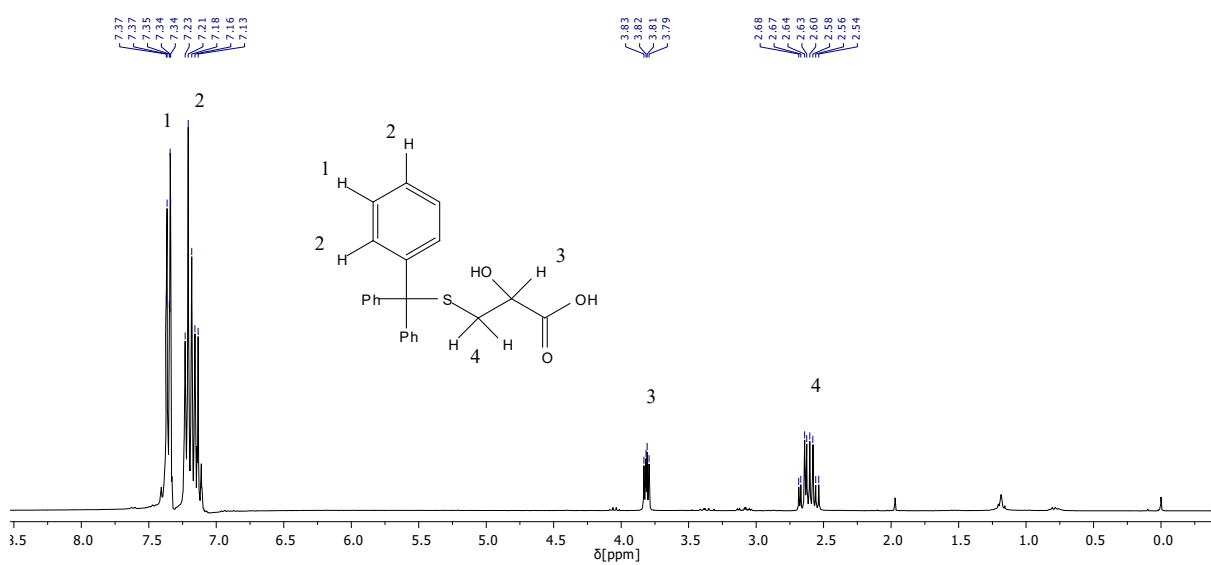

<sup>1</sup>H NMR (300 MHz, CDCl<sub>3</sub>): δ = 7.37 – 7.34 (m, 2H, H<sub>Ar</sub>), 7.23 – 7.13 (m, 4H, H<sub>Ar</sub>), 3.83 – 3.79 (m, 1H), 2.68 – 2.54 (m, 2H).

c)

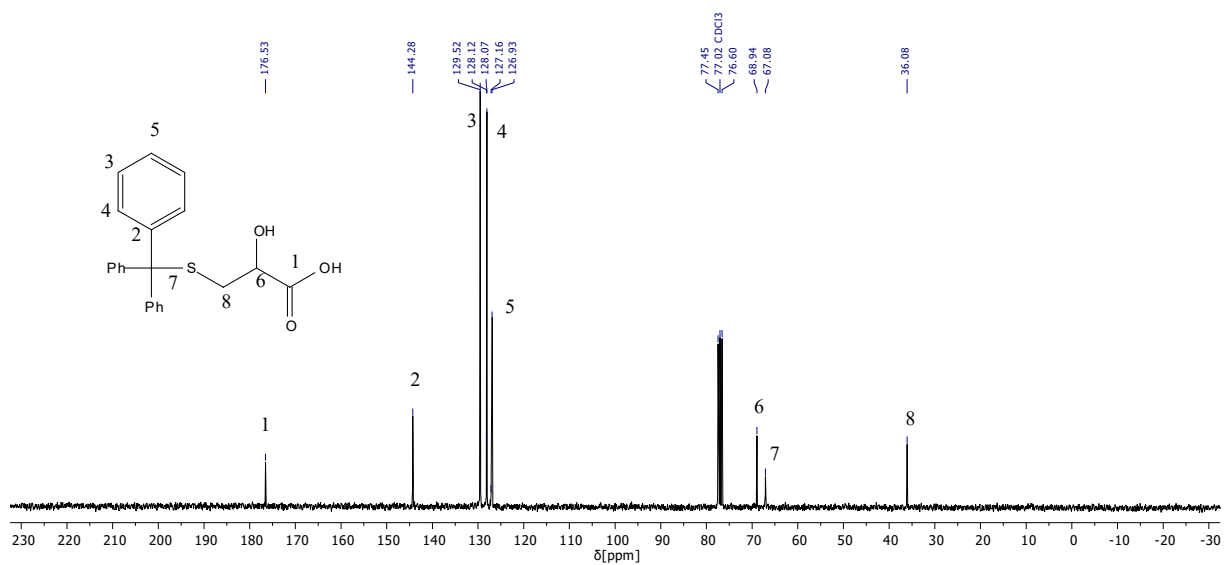



$^{13}\text{C}$  NMR (75 MHz,  $\text{CDCl}_3$ ):  $\delta$  = 176.53, 144.28, 129.52, 128.12, 127.16, 68.94, 67.08, 36.08, 77.45-76.60 ( $\text{CDCl}_3$ ).

**Figure S2. Characterization of 2-hydroxy-3-(triphenylmethyl)thio-propanoic acid (Hmp(Trt)-OH).** (a) ESI-MS spectrum in negative mode, (b)  $^1\text{H}$ -NMR spectrum of Hmp(Trt)-OH in  $\text{CDCl}_3$ , (c)  $^{13}\text{C}$ -NMR spectrum of Hmp(Trt)-OH in  $\text{CDCl}_3$

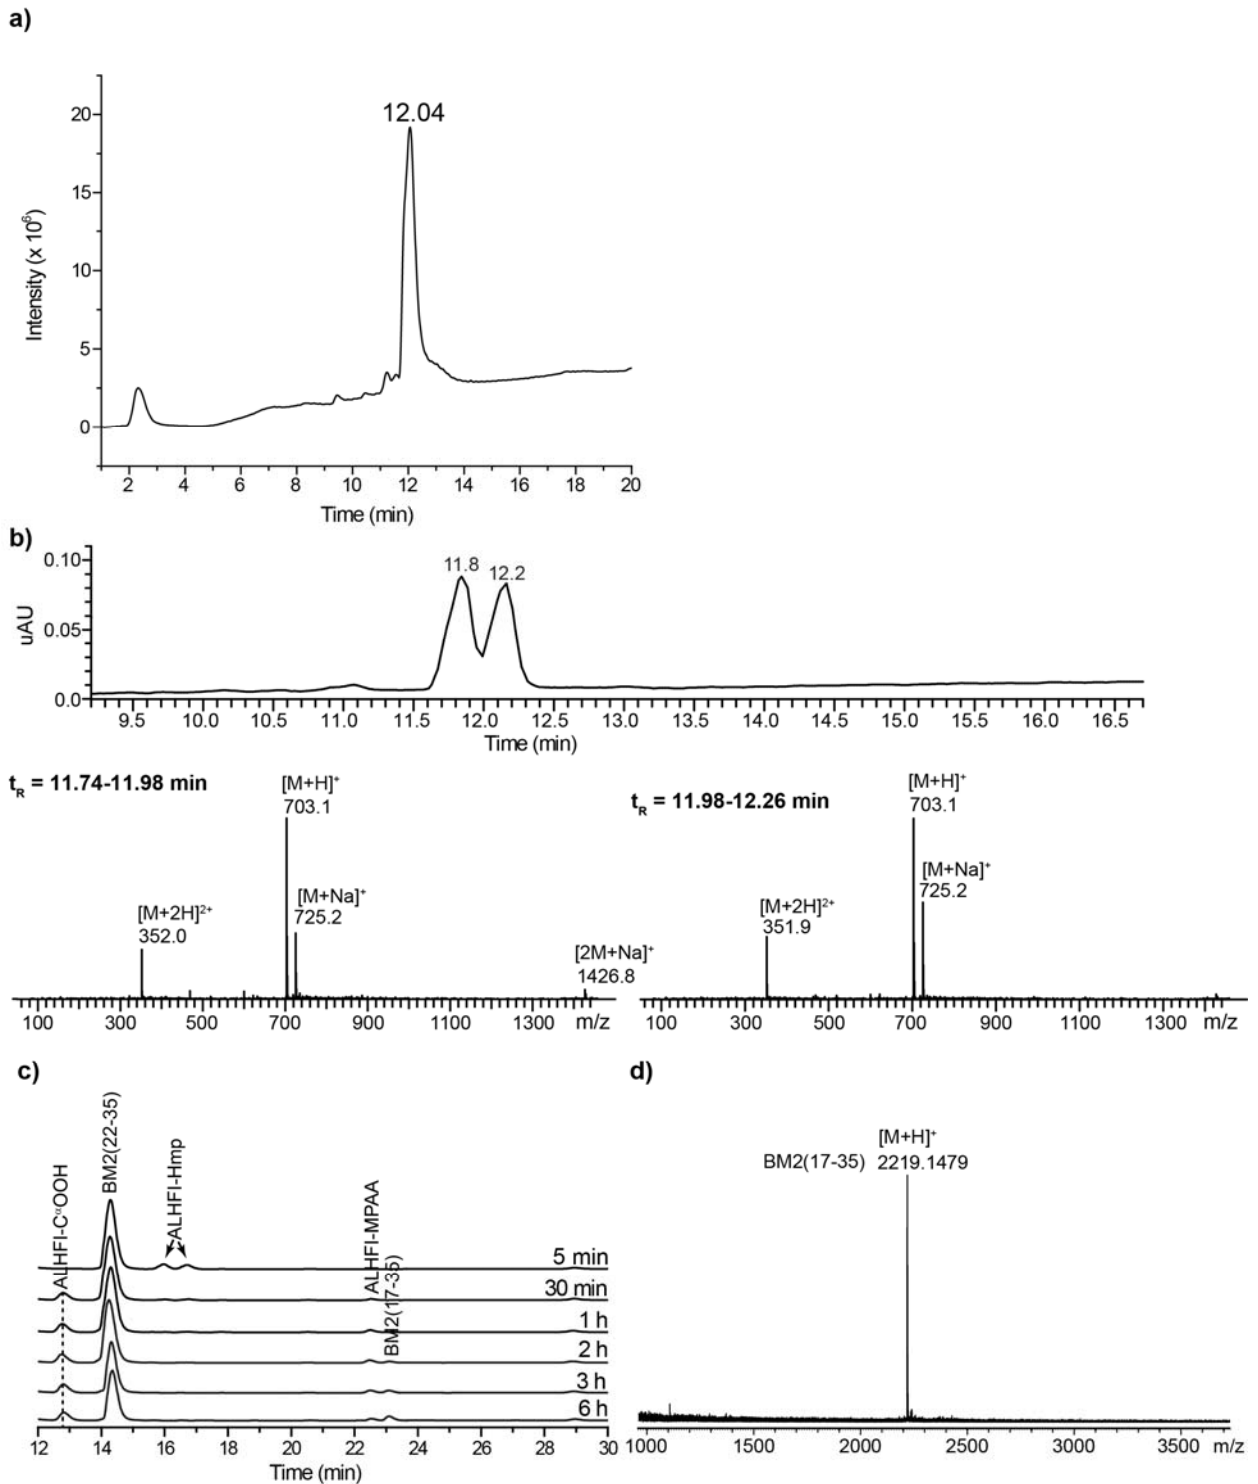

**Figure S3. Characterization of ALHFI-Hmp peptide ligation behavior.** (a) RP-HPLC elution profile of the crude product ALHFI-Hmp, Eluent A was 0.1% TFA in water, eluent B was 0.1 % TFA in acetonitrile and a gradient of 10–80 % eluent B in 20 min, detection was at 220 nm at a flow rate of 1 mL/min, C18 column (b) LC-MS of ALHFI-Hmp diastereomers A and B, Eluent A was 0.1% TFA in water, eluent B was 0.1 % TFA in acetonitrile and a gradient of 20–80 % eluent B in 25 min using a C8 column and (c) RP-HPLC ligation monitoring of ALHFI-Hmp with BM2(22-35) at different time points and (d) MALDI-TOF MS of ligation product [Cys<sup>22</sup>]BM2(17-35). HPLC conditions: 15–45 % eluent B in 30 min, detection was at 220 nm at a flow rate of 1 mL/min, C18 column

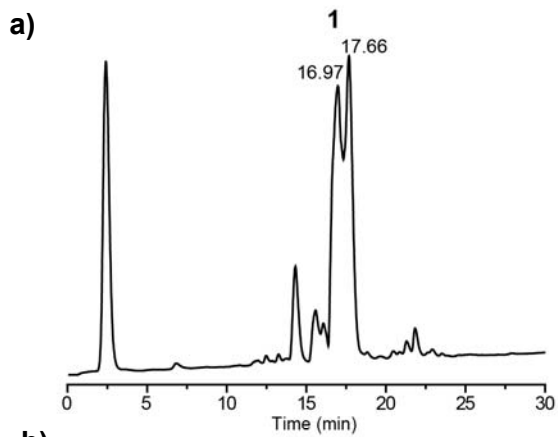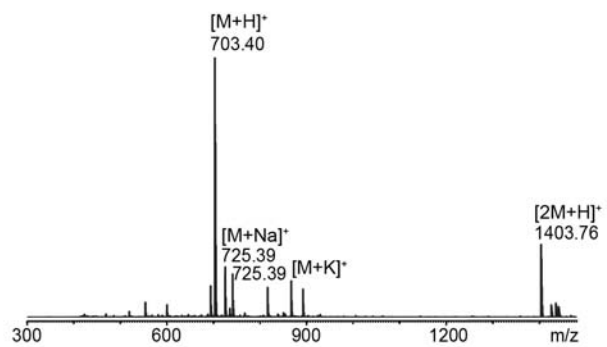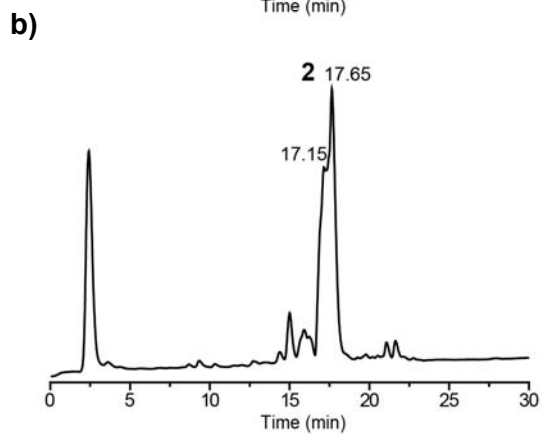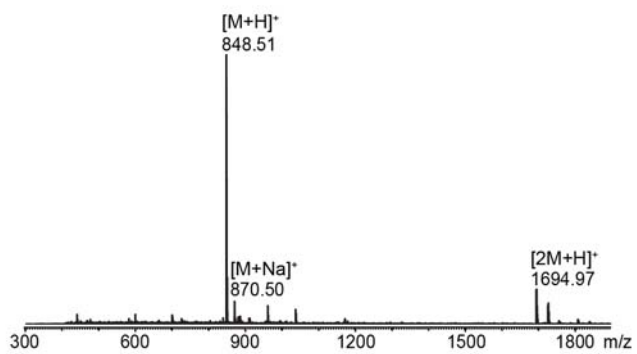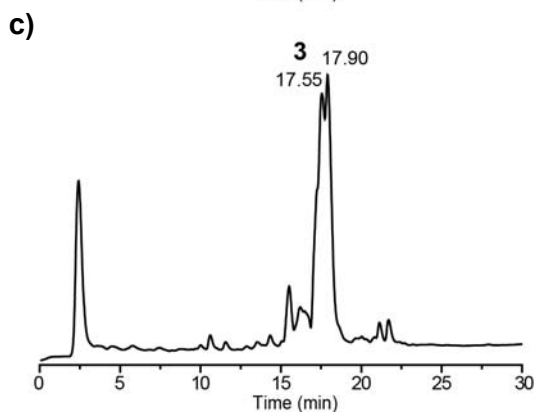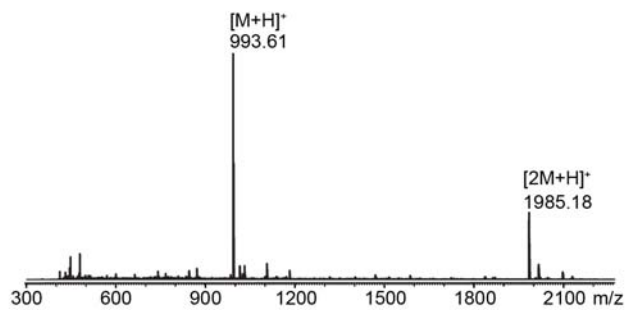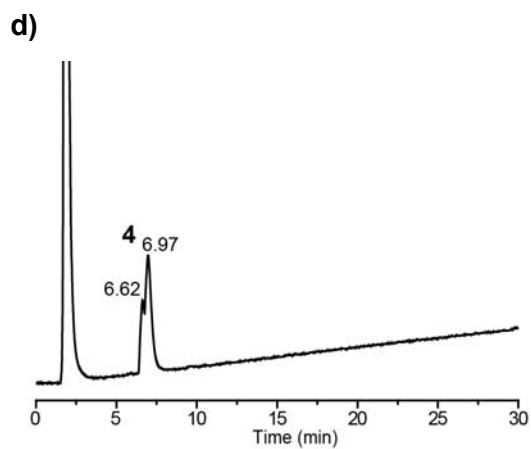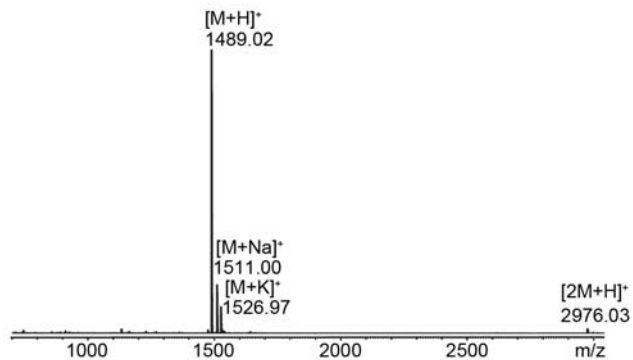

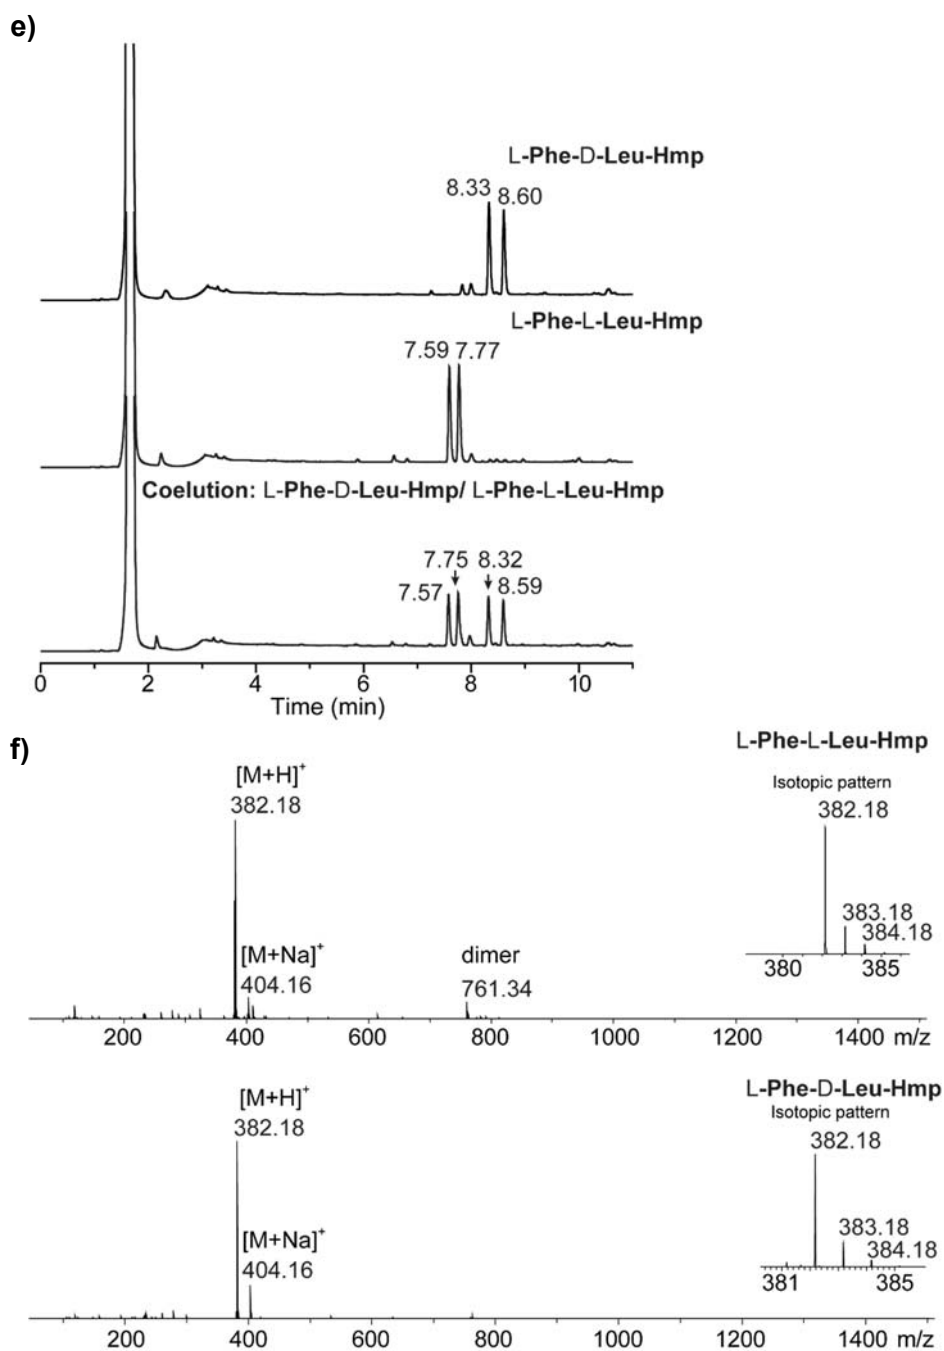

**Figure S4. RP-HPLC and MALDI-TOF MS characterization of crude peptides and racemization behavior of Leu (directly attached to Hmp).** (a) ALHFL-Hmp (1), (b) ALHFL-Hmp-ADO (2), (c) ALHFL-Hmp-ADO<sub>2</sub> (3) and purified (d) ALHFL-Hmp-ADO-Lys<sub>5</sub> (4). Eluent A was 0.1% TFA in water, eluent B was 0.1 % TFA in acetonitrile and a gradient for (a-d) 15–45 % eluent B in 30 min, detection was at 220 nm at a flow rate of 1 mL/min, C18 column; MALDI-TOF MS spectra for (a-d) were recorded at a reflector mode (500 shots/min) and as matrix  $\alpha$ -cyano-4-hydroxycinnamic acid (HCCA) was used. (e) Stacked HPLC chromatograms of crude L-Phe-D-Leu-Hmp (upper chromatogram) and L-Phe-L-Leu-Hmp (middle) and and the coelution of two dipeptides. HPLC conditions: 0–80 % eluent B in 15 min, detection was at 220 nm at a flow rate of 1 mL/min, C18 column. (f) ESI MS spectra of L-Phe-L-Leu-Hmp and L-Phe-D-Leu-Hmp with isotopic patterns as insert.

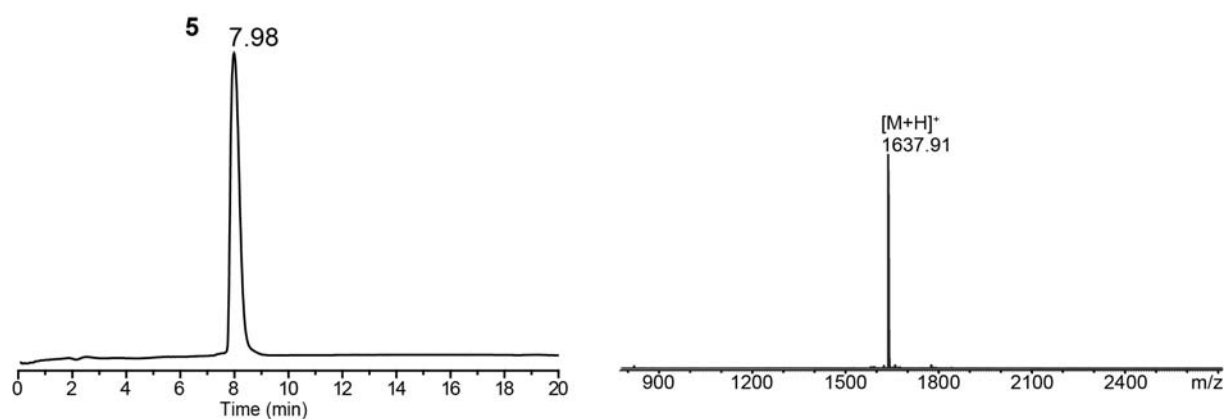

**Figure S5. RP-HPLC and MALDI-TOF MS characterization of purified [<sup>22</sup>Cys]BM2(22-35) Cys-fragment (5).** Eluent A was 0.1% TFA in water, eluent B was 0.1 % TFA in acetonitrile and a gradient: 20–80 % eluent B in 20 min, detection was at 220 nm at a flow rate of 1 mL/min, C18 column. MALDI-TOF MS spectra for (A-D) were recorded at a reflector mode (500 shots/min) and as matrix  $\alpha$ -cyano-4-hydroxycinnamic acid (HCCA) was used.

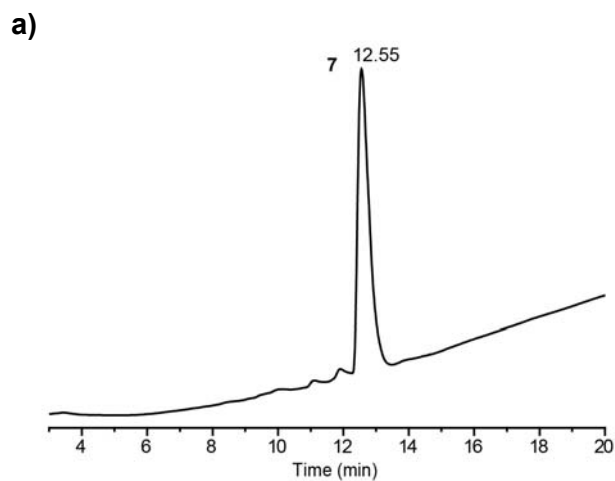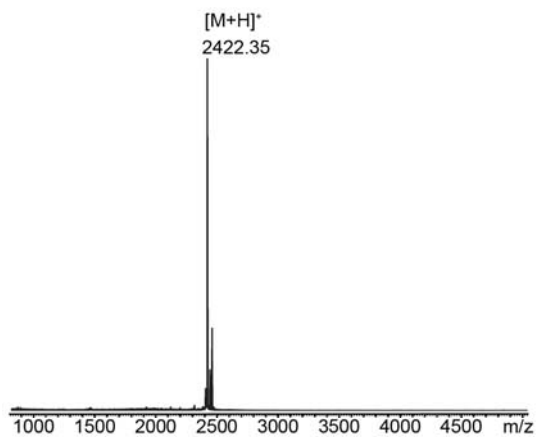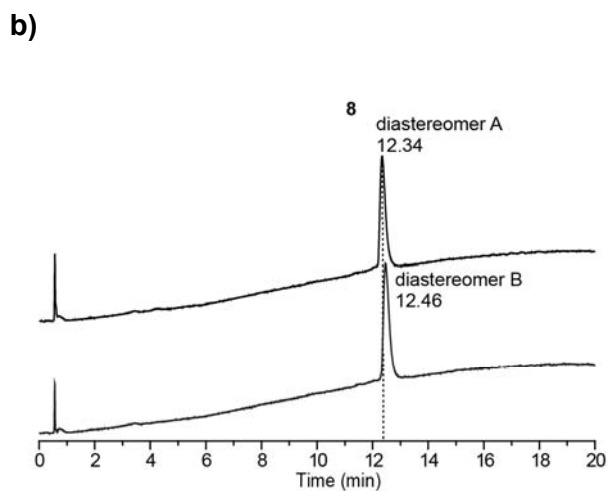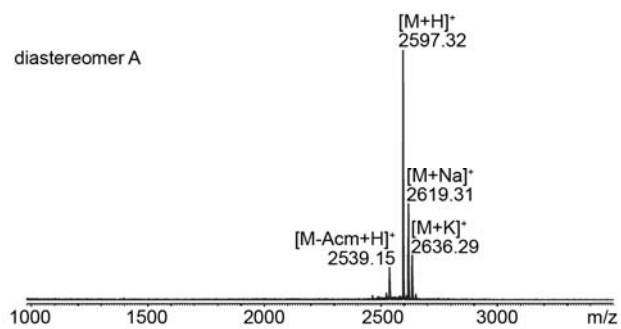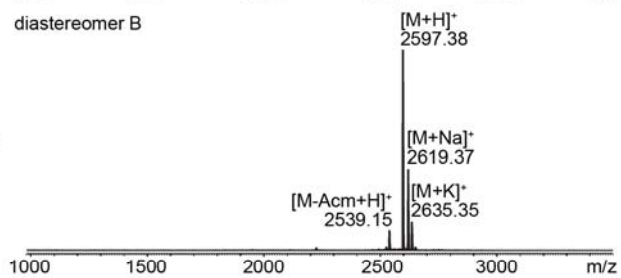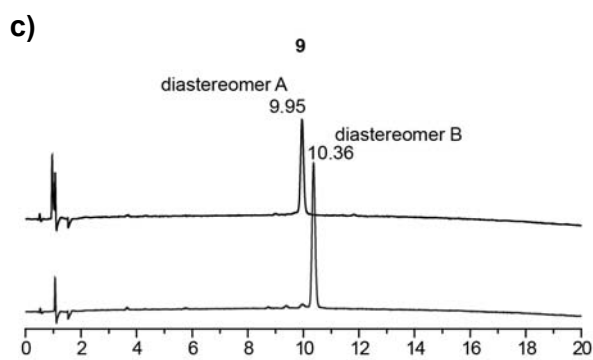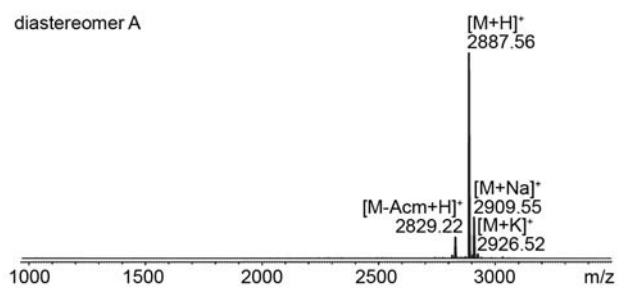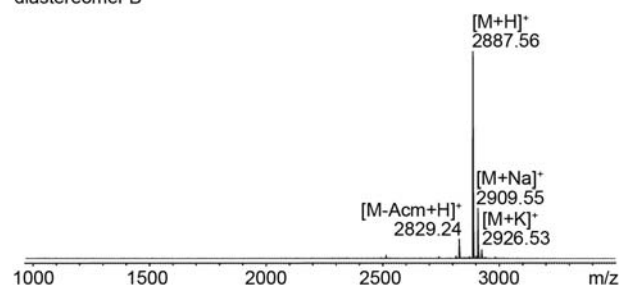

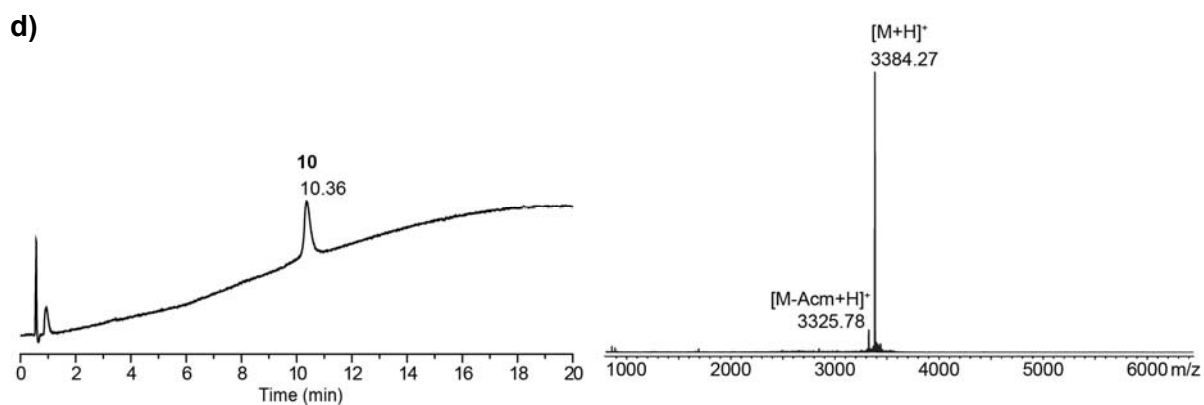

**Figure S6. RP-HPLC and MALDI-TOF MS characterization** of purified **(a)** [Cys<sup>11</sup>(Acm)]BM2(1-21) (**7**), **(b)** [Cys<sup>11</sup>(Acm)]BM2(1-21)-Hmp diastereomer A/diastereomer B (**8a/8b**), **(c)** [Cys<sup>11</sup>(Acm)]BM2(1-21)-Hmp-ADO<sub>2</sub> diastereomer A/ diastereomer B (**9a/9b**), **(d)** [Cys<sup>11</sup>(Acm)]BM2(1-21)-Hmp-ADO<sub>2</sub>-Lys<sub>5</sub> (**10**). Eluent A was 0.1% TFA in water, eluent B was 0.1 % TFA in acetonitrile and a gradient: **(a)** 50 – 99 % eluent B in 15 min, detection was at 220 nm at a flow rate of 1 mL/min, C18 column; **(b)** 10 – 20% eluent B in 5 min followed by 20 – 70% eluent B in 20 min, at a flow rate of 2 mL/min, C4 column; **(c)** 40 – 80 % eluent B in 20 min, at a flow rate of 1 mL/min, C18 column; **(d)** 10 – 20 % eluent B in 5 min followed by 20 – 70% eluent B in 20 min, at a flow rate of 2 mL/min, C4 column. MALDI-TOF MS spectra for **(a-d)** were recorded at a reflector mode (500 shots/min) and as matrix  $\alpha$ -cyano-4-hydroxycinnamic acid (HCCA) was used.

a)

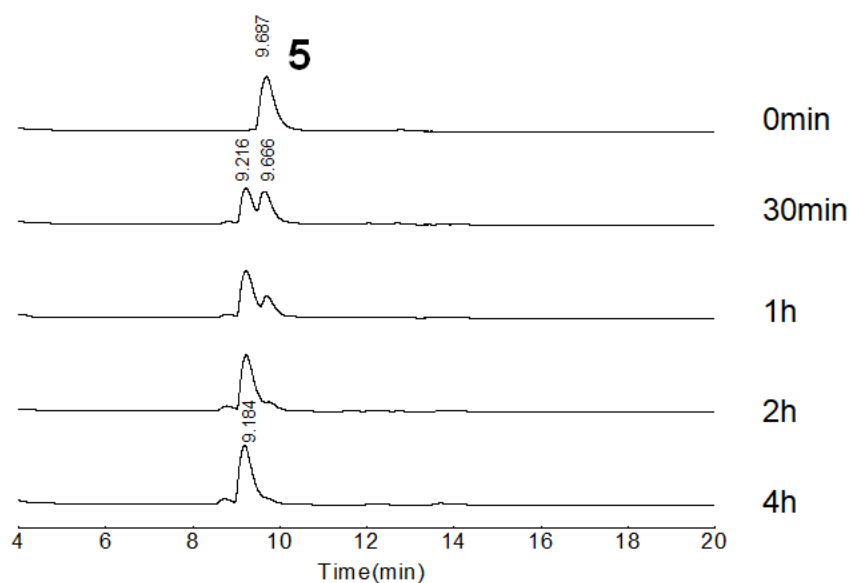

b)

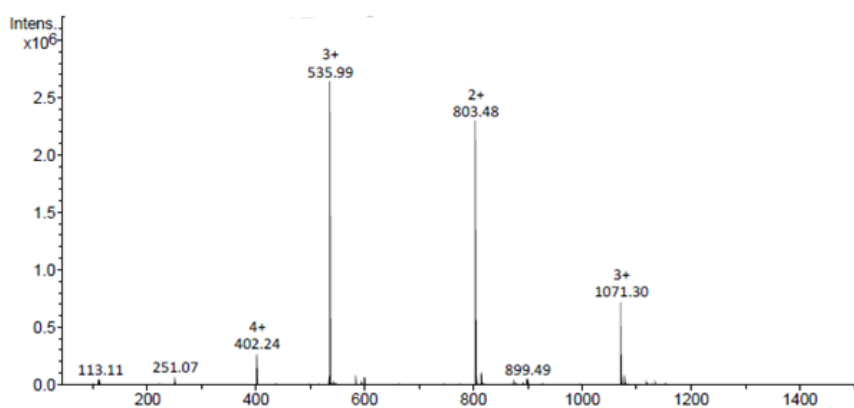

**Figure S7. Desulfurization of peptide [Cys<sup>22</sup>]BM2(22-35) (5).** (a) RP-HPLC elution profile of the reaction mixture at different time points: 0 min (directly after reaction start) – 4 h. Initial peptide eluting at  $t_R = 9.68$  min and reaction product [Cys<sup>22</sup>Ala]BM2(22-35) at  $t_R = 9.18$  min. Eluent A was 0.1% TFA in water, eluent B was 0.1 % TFA in acetonitrile at gradient: 15 – 45 % eluent B in 30 min, detection was at 220 nm at a flow rate of 1 mL/min, C18 column. (b) ESI-MS of the reaction mixture after 4 h of reaction time. Following mass peaks belong to the product [Ala<sup>22</sup>]BM2(22-35): 402.24 [M+4H]<sup>4+</sup>, 535.99 [M+3H]<sup>3+</sup>, 803.48 [M+2H]<sup>2+</sup>. The mass peak at 1073.30 [M+3H]<sup>3+</sup> belongs the **dimerized peptide 5** (BM2(22-35)[Cys<sup>22</sup>]-[Cys<sup>22</sup>]BM2(22-35)).



a)

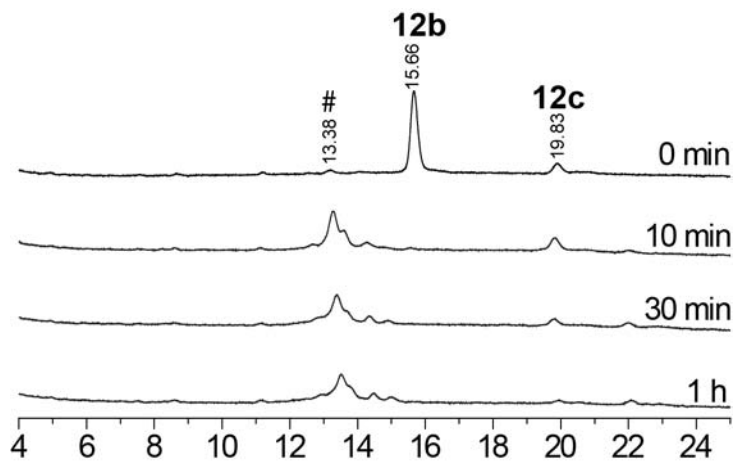

b)

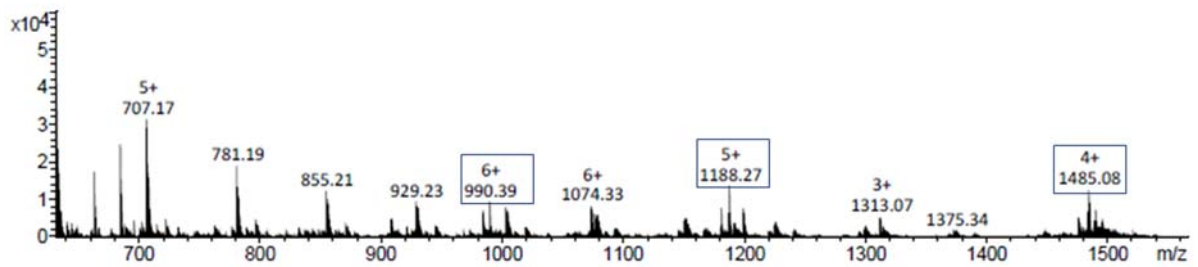

Experimental isotopic pattern  
C<sub>27</sub>H<sub>44</sub>N<sub>7</sub>O<sub>6</sub>S<sub>3</sub>

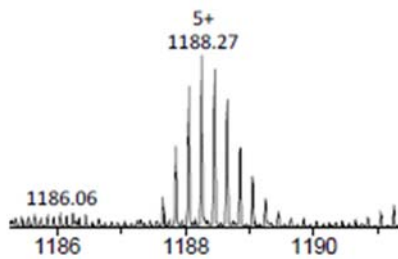

Calculated isotopic pattern  
C<sub>27</sub>H<sub>44</sub>N<sub>7</sub>O<sub>6</sub>S<sub>3</sub>

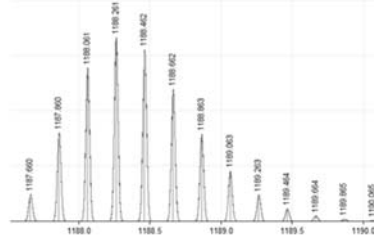

c)

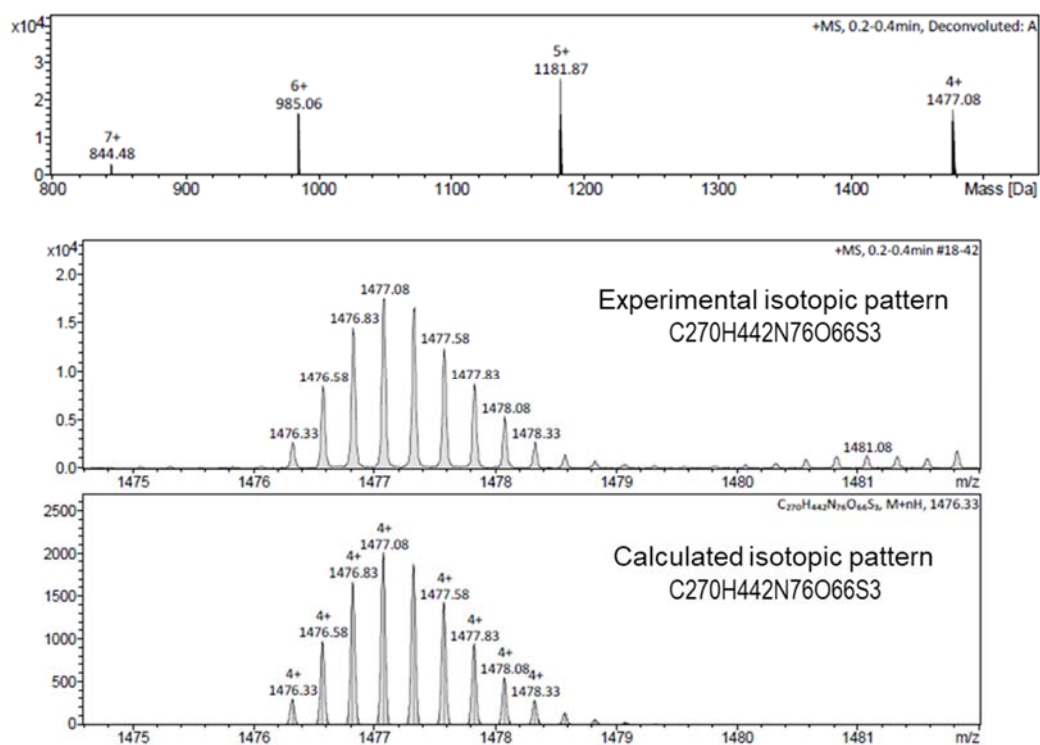

**Figure S8. (a)** RP-HPLC elution profiles of Acm-group cleavage from [Cys<sup>11</sup>(Acm)]BM2(1-51) (**12b**) in iodine/acetic acid solution at different time points 0 min (directly after reaction start) – 1 h. Reaction products are highlighted as **12c** and #. According to peak integration the yield of product **12c** after 10 min is ~ 16 %. HPLC conditions: 45 – 70 % eluent B in 30 min, detection was at 220 nm at a flow rate of 1 mL/min, C4 column (**b**) ESI-MS of isolated reaction products  $t_R=13.38$  min: # - BM2(1-51) where sulfur group of cysteine is present as sulfone and corresponding experimental and calculated isotopic patterns. (**c**) ESI-MS of deconvoluted product  $t_R=19.83$  min: BM2(1-51) (**12c**) and corresponding experimental and calculated isotopic patterns.

## References

1. D. R. Englebretsen and P. F. Alewood, *Tetrahedron Lett.*, 1996, **37**, 8431-8434.
2. C. T. Choma, G. T. Robillard and D. R. Englebretsen, *Tetrahedron Lett.*, 1998, **39**, 2417-2420.
3. E. C. Johnson, E. Malito, Y. Shen, D. Rich, W.-J. Tang and S. B. Kent, *J. Am. Chem. Soc.*, 2007, **129**, 11480-11490.
4. D. J. Boerema, V. A. Tereshko and S. B. Kent, *Pept. Sci.*, 2008, **90**, 278-286.
5. M. A. Hossain, A. Belgi, F. Lin, S. Zhang, F. Shabanpoor, L. Chan, C. Belyea, H.-T. Truong, A. R. Blair and S. Andrikopoulos, *Bioconjugate Chem*, 2009, **20**, 1390-1396.
6. P. W. Harris and M. A. Brimble, *Pept. Sci.*, 2010, **94**, 542-550.
7. S. Lahiri, M. Brehs, D. Olschewski and C. F. Becker, *Angew. Chem. Int. Ed.*, 2011, **50**, 3988-3992.
8. C. Zhan, L. Zhao, X. Chen, W.-Y. Lu and W. Lu, *Bioorg. Med. Chem.*, 2013, **21**, 3443-3449.
9. S. Peigneur, M. Paolini-Bertrand, H. Gaertner, D. Biass, A. Violette, R. Stocklin, P. Favreau, J. Tytgat and O. Hartley, *The Journal of biological chemistry*, 2014, **289**, 35341-35350.
10. S. Chemuru, R. Kodali and R. Wetzol, *Pept. Sci.*, 2014, **102**, 206-221.
11. M. Paradis-Bas, J. Tulla-Puche and F. Albericio, *Org. Lett.*, 2015, **17**, 294-297.
